# Supplementary material for: Recasts versus clarification requests: The relevance of linguistic target, proficiency, and communicative ability
Source: publisher site journal article supplement (doi:10.1515/iral-2019-0149), 2020-09-23
Supplement: Supplementary file 1 [file j_iral-2019-0149_suppl_004.docx]

**RECAST GROUP**

L 01 PRETEST

Um dans le matin Pierre s’est réveillé et fait une rêvé oh non non

Et s’est rêvé avec ton petit copine

Il fait beau et il a voudrait être en vacances

ensuite um tu as téléphoné ton petite amie um

il est content et il fait un rendez-vous avec ton petit amie

um ensuite il s’est habillé umm

il fait chaud um ensuite il s’est dépêché et

parce que il être en retard

et il a descendre vite et il a tombé sur la valise et

s’est cassé la jambe um

ensuite les infermiers umm apporte lui et

ton petit amie attendre à l’aéroport

et les um l’ambulance venir um et

les infermiers apporter lui à l’hôpital

um elle sait sait elle ne sait pas umm

L 02 PRETEST

La fille est ... s’appelle Giselle

Elle se rè-ve et elle a vu un beau soleil err

Elle decidé/er de se promener um le chien

Elle se prom-e-ne elle se elle s’est promené

elle s’est promené

Et elle passe devant la maison

a-h elle a vu un peintre un peintre et un err

La femme a regardé la fenêtre

Le peintre a jette a jette un coup d’oeil sur Giselle

sur Giselle

et la peinture s’est renversé

Err il s’est tombé err sur le trottoir et il s’est cassé la jambe

La femme on téléphoné un ambulance err err

Il s’est blessé et il ne peut pas marcher err

Err après quinze minutes l’ambulance est arrivé

Et les infirmiers umm lui emmené/er err sur le brancard

Le chien umm a aboyé très fort et

Giselle est était stressé err mais la femme était calme

L 03 PRETEST

Giselle elle se lever /é à sept heures et demie um

Il fait beau um elle decidé/er se promener um avec le chien et

Elle se promener/é et passer/é le travailleur

La maison devant a les nouvelle paint um

Elle um um un garcon um um fait la peinture à la maison autre et

Après ca un garcon a tombé/er um il se casser/é sa jambe et

Et une fille um telephone/é l’ ambulance um

Après ca le ambulance um dit le garcon

Um l’ambulance arriver/é et le garcon ne pouvoir pas marcher

Um et après ca le chien aboyer/é/ait et

Après ça elle rentrer/é la maison et elle mangé/er/ait un sandwich

L 04 PRETEST

C’était mardi et Jacques se réveille

après il a fait un rêve um

après il se réveille il telephone se sa petite copine et

il a fait un rendez-vous um

après ca il a il s’habillé il s’habille , désolé, et

il a vu que il fait beau aujourd’hui um

il a appelé un taxi um pour aller en ville

mais quand il a descendé l’éscalier il a il est tombé de ...

il est tombé de son sac

umm sa copine a la appelé et mais il n’a pas repond - é

alors elle est elle est allée au chez soi et

elle appelé l’ambulance et

il est allé à l’hôpital

L 05 PRETEST

Hier professeur Maffard a dormi encore à huit heures err

Il se réveille il s’a  re  il s’est reveillé en retard à huit heures et demie

Um quand sa femme umm a venu dans sa chambre um

Il a pris son petit déjeuner à neuf heures um

Avec un café noir hmm um et et un pain avec le beurre le beurre

Um il est couri pour prendre de bus et

il a arrive en retard à l’arrêt de bus

Um... umm... il a pleuré pleuré er er oui um

et il il est il a  oublié son parapluie

um il a il a arrivé au lycée en retard et

ses élèves sont très bien en attendant pour il umm uh

 L 06 PRETEST

Um professeur Maffard dormir à huit heures

Et la femme ouvrir la porte s’est ré- révé oh révelé

Um il prendré le petit déjeuner très rapidement aah il plu

et il courir aah um man-monquer/é le bus ahh

uh il arriver/é à le lycée en retard entrer en retard ahh

les étudiants um il entrer les classe à huit heures trente

ah retard les étudiants est très surpris

Il s’excuser /é et um n’être pas fâché

 
 
 
 
 
 
 
 
 

L 07 PRETEST

Il se réveillé à huit heures moins le quart ah

Il fait beau mais uh le ciel est ah uh uh uh

Uh uh le soleil ... okay um um so il um il fait un rendez-vous à telephone um

Um il est content avec ca um il s’habillé/er um um lentement

Um puis um um le taxi um s’ était atteindre pour lui

devant la maison um

Uh um il est il est tombé um um avec la valise et il s’est cassé la jambe um

L’ambulance ... uh uh il a appellé pour l’ambulance uh l’ambulance et

Il a vient ils venir pour lui

L 08                             PRETEST

Hier il a réveillé um  d’être en vacances

Et il rève de temps qu’il fait beau

Er puis il a telephoné à sa à sa petite amie

et ils ont voulu ils ont vu ils ont voulu um d’aller en vacances aussi

peut-etre à l’Espagne

et  puis il um s’est habillé et

quand le temps c’était très beau et le soleil brillait

um le taxi le taxi a déjà attendu devant sa maison

et il err il a pu de se dépêcher err

il était très tard et il a il est descendu  très  vite.

Mais trop vite et tout d’un coup er il a il est tombé

et la valise s’est cassé aah et  la valise est tombé aussi

mais il s’est s’est cassé la jambe

puis l’ambulance er a dû devenir et les infermiers er

lui ont  lui apporter/é  à l’hôpital

mais sa petite amie a déjà attendu à l’aéroport

mais il ne peut il ne peuve pas aller en  vacances   
 

L 09 PRETEST

professeur Maffard um dor- dormir encore

parce que err réveille-matin

err um um ok um réveille-matin ne sonner/é pas ce matin err alors

quand la femme ouvrié la porte il se réveiller /é

et il se lever/é très vite

um à huit heures et demie

puis il prend le petit déjeuner et il se ... il se dépêche um

dehors il pleuvait beaucoup et ensuite il sorti um

il pleauvait beaucoup et il couri le bus quand c’était pluie umm

il y a beaucoup de vent umm

il n’ avoir pas de parapluie et il manque le bus

yeah il manque le bus umm

il il a il avait être fâché um

il arriver/é le lycée en retard

et les étudiants um um les étudiants ...

étaient attend-attendre dans la classe pour lui

umm il éntrer/é la classe à neuf heures et demie et

les étudiants étaient/été surprise

umm le directeur n’être pas fâché

L 10 PRETEST

Il se réveille à huit heures dans le matin

Il fait un rêve um à ton petite amie

Et il fait beau

Il pense- er/é une bonne idée que faire en vacances

Il telephoner/é ton petite amie

Elle est contente et fait un rendez-vous

Um il s’habiller/é

Um il y a beau et aussi très chaud

Parce que s’est beaucoup de soleil

Le taxi attendre devant la maison de il

Il être un petit peu en retard

À peu près neuf heures um il est un petit peu en retard

Quand il courir dans um (stairs) descende par l’éscalier

il tombé/er la valise

et s’est cassé la jambe

umm l’ambulance arriver/é pour il

et il finir à l’hôpital um

elle est très triste

L 11 PRETEST

Um un jour um un fille s’est reveille très vite um

et il fait beau um

elle a decide de elle a décidé se promener avec um

se promener um son chien

um elle a vu un peintre um il se

um il a il est tombé et il s’est cassé la jambe um um

L’ ambulance venu um et ah-h

le chien uh (don’t know) aah le chien abboyé/ait a abboyé et um

elle était …elle a désolée

L 12 PRETEST

Umm quand Giselle a se réveille elle a voit

Que le sol... que il fait de soleil et elle a décidé décidé que

Umm promener à le chien um um

Err elle a se promener et passer a passé/er devant une maison um

Où une femme regarder/é la fenêtre

Um umm il y a une un peintre et il il a jeté un coup d’oeil sur Giselle oui

Umm tout à coup err le l’homme a tombé

et la femme téléphoner/é l’ambulance um

parce que l’homme n’a pas non n’a peuve pas

Err ne peut pas marcher

L’ambulance a arrive oui

Emmener à um il emmener l’homme et le chien a aboyé

Et le umm et la femme a um a calmé Giselle

Parce que elle est ...um elle a été stressé

L 13 PRETEST

C’était un beau jour uh Giselle s’est révé-illé

et elle decider/é promener avec le chien

elle est proméner/ quand passer la maison et

il y a un homme

il est peindre la fenêt... oh la maison

quand il il il voit la femme oh passer il maison uh

il il tomber/é et il casser/é la jambe parce que la femme est la pein(?) ooh

l’ambulance arriver/é et

(I don’t know) uh il ne pouvait pas marcher et

L’ambulance arriver/é et et il va l’hôspital umm

L 14 PRETEST

Un matin um il se réveille et il um elle fait il fait un rêve um

Il être en vacances avec um um petite amie et um

Alors elle oh il téléphoner/é et um le ah la petite amie et um

Elle est très contente um

Um il s’habiter um tout le temp... oh tout de suite et um

Il est très chaud um um um (I don’t know)

Um il descendre l’escalier et um il être en retard um

Le taxi um est attend devant la maison um

À peu près neuf heures elle tom... um il tomber /é la valise et

casser/é la jambe um

Oh l’ambulance um veni et

les infirmiers apporter um... hospital

L 15 PRETEST

Giselle réveiller/é et à dix heures et le soleil s’est très ...ahh

Elle est promener/é avec le chien se passé/er la maison et

Et il y a un garcon qui il et jeter penture et he

il jetter/é un coup d’oeil sur Giselle

Mais il uuum le peinture s’est errr err un home il tomber la jambe

Giselle telephone/er l’ambulance et le

So il ne pouvoir pas marcher c’est l ‘ambulance arriver/é et

Et trransporte il dans l’hôpital

Il est dans le brancard mais le chien c’est très joli

Et Giselle très stressé

Aaah la femme c’ est très stressé mais le cien c’ est joli

Ahh le chien abboyer yeah

Giselle il n’a l’hôpital

L 16 PRETEST

Il faisait très froid et proffesseur Maffard a dormi plus tard

um à huit heures et demie ta marie um ah sa femme um

a ouvri la porte et elle um a um se dit que il um se réveiller

um je ne sais pas

um Il a puis il a prend pétit déjeuner très vite et il a bu du café um

quand quand il est parti sa maison il faisait ah

il était plauvait il faisait pleuvait il pleuverait hm

um et son bus était um je ne sais pas um um ...

quand il a arrive au lycée um tes ah les étudiants est (already)

um déjà est déjà um dans la classe

um il um il ont ils ont pris (?) impatients

um il a entré la classe à neuf heures et demie

et l’étudiants um ont pensé que il n’a arrivé um

L 17 PRETEST

Umm il dormir hier soir

Il pleurer il pleurer/é um et après il levé um il levé

Parce que sa mère um ouvrir la porte

Um et je pense que il umm il oui umm

Après ca il manger um prend le petit déjeuner

Et um c’est pleuvoir um au dehors umm

Je pense que umm il être en retard umm pour le car de ramassage um

Alors il um il oh um couri couri après le bus um

Et c’est um pluit

Oh yeah oui il n’avoir pas de parapluie

um il arriver/é à lycée en retard

et les étudiants attend dans la classe oui

umm il entrer/é la classe uh à neuf heures et demie

les étudi... oh uh oh son excuser um avec:

“je suis réveillé plus tard” oui et le directeur n’êtes pas fâché

L 18 PRETEST

Giselle se réveiller/é et il fait beau

Donc elle promenade le chien uh

quand elle promener le chien elle passe devant la maison

err et il y a un home peindre umm elle

et le marie de l’homme regarder le fenêtre la fenêtre

et quand elle passe il il se renverser non uh

la peindre se renverser umm et elle tomber/é le trottoir

elle tomber/é sur le trottoir et blesser et le

et l’ambulance arriver/é/ait et

emmener le homme en brancard

et le chien aboyer/é

**L 01 POSTTEST 1**

Professeur Maffard a dormir après huit heures umm

Et il faisait... il y a... il pleut il pleut et

Ummm ok et la femme ouvrié la porte

Et s’est réveillé professeur Maffard

et professeur Maffard s’est levé vite à huit heures et demie

professeur Maffard umm mangé le petit déjeuner vite

et umm ok professeur Maffard mangé le petit déjeuner umm

umm oh il a sorti (?)

il sorti et il est courié dans la pluie et

umm et il n’est pas de parapluie

il a courir pour pour l’autobus et

il il manqué le bus

umm il est fâché umm

quand quand il a arrivé au lycée il est en retard

et les étudiants...

il est gêné et les étudiants est surpris

quand il entré la classe à neuf heures et demie

les étudiants est surpris et il.... il s’est excusé pour être en retard

et il n’est pas fâché

le directeur n’est pas fâché pour professor Maffard et...

**L 02 POSTTEST 1**

Il s’est réveillé et il a pensé de d’aller en vacances

Avec sa petit sa petite copine umm il a pensé de de umm oh non non

Il faisait beau et il a décidé de telephoner telephoner sa petite copine

Et il il a il ont fait rendez-vous et il était content

Il s’est habillé et il a mis umm une chemise

Et il y avait tout ... il faisait toujours beau

Mais le taxi a dit dépêchez- vous et

Parce qu’il parce qu’il s’attend parce qu’il le a attendu

Et il était en retard

Il il est descendu vite

Après après ca il est tombé et il s’est cassé la jambe

Il était trop tard

Umm quelqu’un s’est quelqu’un s’est rappellé l’ambulance et

Quand quand il est venu l’ambulance on a emmené a lui emmené

Et sa petite copine a attendé lui attendait l’attendait

Parce qu’elle n ‘a pas savoir que se passait

**L 03 POSTTEST 1**

Un jour le garcon penser aller en vacances avec ummm une petite petite copain

Umm il téléphoné umm et il fait une rendez-vous mais

il fait un rendez-vous à neuf heures umm

mais c’était et umm huit heures et demie

il s’est (still on phone) il téléphoné elle mais

parce que c’est umm huit heures neuf heures moins quart

il s’habillé très vite

mais c’est une très c’est une très beau jour avec umm très chaud

il metre de pantalon noir et une t-shirt blanche

umm après ca parce que c’est est neuf heures umm moins dix

le taxi est attend il est très en retards

et le garcon qui s’appelle Georges descendre le stairs très vite

mais il tombé ... il s’est cassé la jombe de lui

et il est très malade ummm

après ça le copain un autre appelé l’ambulance

et umm mil n’est pas allé en umm les vacances avec la petite fille

**L 04 POSTTEST 1**

Professeur Maffard il a il est........ il a dormi encore après huit heures

Parce que il était l’hiver et il faisait froid et biensûr errr

Le réveil-matin errr n’a pas sonné

Alors la femme a ouv.. a ouvri la porte et il s’est réveillé

Et il s’est lévé vite à huit heures et demie umm

Très vite il a il est il a pris le petit déjeuner et

umm oh quand il quand il a prend le petit déjeuner

Il il a commencé de pleuvoir umm

Après ca il est sorti et il a il a couri dans la rue umm

Il y avait beaucoup de vent et ummm

Alors il n’est il n’est pas il n’a n’a pas eu le parapluie et

Malheureusement il a manqué il a manqué le bus

Umm il faut qui que il faut qu’il con.... (not audible) à l’école

Umm il est arrivé au lycée à neuf heures et demie

Et les étudiants étaient très surpris

Mais il s’est il s’est excusé et le directeur n’ était pas fâché

**L 05 POSTTEST 1**

Giselle s’est réveillée umm quand le soleil se levé/er/ait

Umm il faisait très beau et donc elle a décidé se promener avec le chien

Umm en entrain de se promener avec le chien umm elle passé

Elle a passé umm un peinteur un peinteur qui umm

Qui a painté umm les murs sur la maison umm

Il y avait un chie.... une femme aussi qui a regardé le peinteur

Par la fenetre umm

Giselle était une très belle femme et le peinteur a jetté un coup d’oeil et umm

La verde peinture umm se s’est tombé umm de la balcon umm

Il était tombé non il est tombé et malheureusement

Il il s’est cassé la jambe aussi umm

La femme avait très peur et ella a telephoné à l’hôpital

Et l’ambulance est arrivé umm très vite ummm

Et l’ambulance a l’emmené l’homme à l’hôpital

**L 06 POSTTEST 1**

Une femme c’est réveillé à dans le matin

Et le soleil il fait beau umm donc a elle décidé à

décidé à se promener

Elle se promené et elle passé une umm un peindre

Un peintre il peindre la maison la maison

Umm il voit elle il umm

Umm s’est promené umm

Elle a passé un homme peindre a peindre la maison et il il..

Il a jetté un coup d’oeil elle umm

Le peinture a tombé dans la rue

et il tombé dans la rue

Umm et s’est cassé il la jambe jambe et il

La femme téléphoné l’hôpital et il il

l’ambulance a arrivé pour l’homme et umm et le umm

et le chien aboyé à l’homme

et le umm le femme umm elle a stress

**L 07 POSTTEST 1**

Une matin professeur Maffard err il a dormir dormi encore

À huit heures err s’est hiver err

Le temps errr dehors était froid umm et

Son horologe n’est sonné pas

Une femme a ouvri la porte err et il se réveillé à

Et il s’est levé très vite à huit heures et demie

Um il a prendu le petit déjeuner umm en s’est a commencé à pleuvoir dehors

Um il a sorti umm et le bus est il a manqué manqué err le bus

Donc il a il a été très fâché

Err quand il .... il est arrivé umm au lycée en retard err

Il a trouvé les étudiants attendre dans la classe

err il a entré la classe à huit heures et demie et les étudiants err

étaient err surpris à sa ummm

il a s’excusé err le directeur et il n’ être pas fâché

**L 08 POSTTEST 1**

Dans l’image onn peut voir Monsier Maffard

c’est le professeur ...il il est dormi la dormi encore

C’est err c’était l’hiver et il faisait il était très froid

Et le professeur err a lit il a lit encore son livre

Puis la femme la femme du professeur a ouvre ouvri la porte et

Le professeur il s’est réveillé et umm et levé très vite

Et les... il était huit heures et demie

Après a pris son petit déjeuner il s’est dépêché

Err il a il a commencé de pleuvoir puis il est sorti

et la pluie et il y avait beaucoup de pluie du vent et

Il a il n’est past le parapluie mais puis il ... il était err trop trop ....

Et il a manqué le bus et il était très fâché

Puis il est arrivé au lycée et umm il était il était neuf heures et demie à l’école

Let les étudiants de monsieur Maffard errr avont attendu tout le temps

Mais puis il est entré dans la classe à neuf heures et demie et

Les étudiants étaient très surprise et il s’est excusé le directeur

Mais n’était pas faché avec lui

**L 09 POSTTEST 1**

Err Giselle se reveille et il fait très beau

Il y a il y a de soleil et elle a décidé se promener ton chien

Ummm quand quand elle se promener elle passer devant la maison

Et elle a vu le peintre

Il ..... elle a vu elle a vu ummm la femme de peintre

Ummm ummmm

Il a jetté un coup d’oeil sur Giselle et le peintre son se renversé/ait à Giselle

Ensuite le peintre a tombé et et il se cassé la jambe

La femme de peintre a téléphoné l’ambulance

Et le peintre a ne peut pas marché

Donc quand l’ambulance a arrivé err les infirmiers a gardé le peintre

Umm les infirmiers emmené le peintre à le brancard et

Le chien aboyé

Giselle était très désolée

**L 10 POSTTEST 1**

Il est huit heures et professeur Maffard est dormir

parce que il ne sonné pas le réveille de matin

la femme de professeur Maffard est allée dans le.... dans la chamber

et elle s’est réveillé professeur Maffard à huit heures et demie

il prend le petit déjeuner très vite et il pleuvoir beaucoup

il sortir mais c’est beaucoup il pleuvoir beaucoup et aussi

c’est beaucoup de vent

et il n’avoir pas de parapluie

il manquer/é le bus mais le bus est allé et

il est très faché

il arrive/é à lycée en retard et

les étudiants est dans la classe

il entrer/é la classe à neuf heures et demie à demi-heure en retard

et les étudiants est très surprise

il s’éxcuser et le directeur est n’est pas faché

**L 11 POSTTEST 1**

Il s’est réveillé à huit heures et demie et il faisait beau umm

Il ... il a pensé de sa petit amie petite amie umm pour aller en vacances umm au soleil

Il a téléphoné sa petite amie pour faire un rendez-vous umm

Il se... il était très content

il s’est habillé um il s’est habillé vite umm et

il toujours était beau et chaud

umm il s’est dépêché il s’est dépêché parce que le taxi attend

attendre attendé pour il umm et il était en retard

il descende il a descendé il a descendé très vite et - oh noo

il il s’est tombé il s’est tombé et il s’est cassé la jambe oh la la

ummm il était aussi trop tard umm

il faut appeler l’ambulance umm

parce que il a ... il s’est cassé la jambe umm

et il ve... il a venu au l’hôpital umm

et il s’est passé il s’est passé deux jour dans l’hôpital et

son petit sa petite amie attend attend pour il

**L 12 POSTTEST 1**

Une le matin il se réveille et umm il fait beau il a fait beau

Il a fait du soleil et umm il a pense que aller en vacances avec

Avec sa petite copine umm ummm

Il a telephone um lui lui et umm il a fait une rendez-vous à umm neuf heures

Et il est très content

Il a été très content

Il a umm il est s’habille et umm oui il est chaud il a été chaud

Et il est il se il s’est dépêche et descendre vite

Et le taxi err le taxi a attendré et tout d’un coup il a tombé

Et umm et il a il a il se dépêche parce que il a été trop tard err

Il a tombé et le chauffeur de taxi est a appelle l’ambulance oui

Et elle a elle attendrait à la aéroport

**L 13 POSTTEST 1**

Il y a un homme et il s’est réveillé le matin

Et il pensé/ait/er aller en vacances avec la petite copine

Err il téléphoné/ait/er la petite copine

Et fait un rendez-vous et elle est très contente

Ummm il habillé et umm mais il est en retard

Et il tombé sur la valise et il cassé la jambe

Et il il est trop tard

Il appelé umm il veni en hôspital et il ne pas savoir oh noo

**L 14 POSTTEST 1**

Professeur Maffard ummm dormait encore à huit heures

Parce que c’est hiver il il est froid umm

Donc il ne sonné/ait pas réveille-matin ne sonné/ait pas

Ummm umm la femme ouv... ouvri la porte et umm

Elle se réveille umm professeur Maffard et

Il se levé et il est huit heures et demie

Il prend le petit déjeuner et il se dépêché

Umm et il pleuve-oir

Il sortir umm il couri couri (?) ummm et

Umm il umm n’a pas de parapluie ummm

Il arrivé le lycée en retard

Et il est gêné ummm parce que les étudiants attend dans la classe

Et il entré la classe à neuf heures et demie

Et les étudiants sont surprise

Le directeur n’est pas fâché

**L 15 POSTTEST 1**

Il se réveillé à dix heures et il y a trop de soleil

Il pense à une petite amie... et il ... est aller en vacances avec la petite amie

Il telephoner ...et parler et un fait rendez-vous ...

il est ... elle est être contente avec lui

Umm il s’est habillé avec une blouse et le pantalon ummm

C’est très chaud ........................... parce que il y a trop de soleil umm

Il s’est ...il s’est dépêché parce que il y a une taxi

Mais il est en retard

Il s’est dépêché et descendre vite l’escalier

Mais je tombe et s’est cassé la jambe

parce que il il il tombe errr

il est trop tard pour le rendez vous et pour le taxi errr

Il oh le fille être ... très

Il est à l’hôpital parce que le gen ...et

L’ambulance emmener/é le garcon pour l’hôpital

Il n’est...

La fille dans l’aéroport s’est n’est pas savoir

**L 16 POSTTEST 1**

Hier umm il faisait beau ummm il y avait beaucoup de soleil

Giselle s’est réveillée et ella a décidé décidé umm que

S’ est promener le chien umm

Pendant le promener elle a passé devant la maison umm ummm

Il était un homme qui était painting la fênetre um m

L’homme est jetté un coup d’oeil sur Giselle et

Il s’est renversé et la peinture est tombé ummm

L’homme est tombé aussi et

Il s’est cassé la jambe

à la femme a téléphoné l’ambulance umm

qui est arrive très vite umm

l’homme ne pouvoir pas marcher à l’ambulance

parce que il s’est blessé

l’ambulance est emmené l’homme au l’hôpital à l’hôpital umm

et le chien le chien ummm est venu aussi

**L 17 POSTTEST1**

La femme se réveillé dans le matin.

Il (fait) il faisait beau et elle décidé/er promener se promener err ton chien

um quis’appelle toby

umm elle se elle se promené le chien umm dans la rue

et près um de des maison umm

il y a le peinture qui um peinture peignait les fenetres

et elle les regardait/er/é umm

ohh ohh quand il elle a dit avec l’homme qui peignait la fenetre

le le peintre se renversé/er umm et le l’homme qui qui dit avec la femme

il tombé um il se tombé il umm

alors la femme elle appellé um sa mère

et elle demandé si um si elle peut appeller l’ambulance umm

alors l’ambulance arrivé et l’homme l’homme pris umm...

emmené à l’hôpital et

la femme elle elle très triste parce que um

elle elle c’est très triste et

oh le chien il couri dans la rue

**L 18 POSTTEST 1**

Un homme se réveillé un jour et pense qu’ils sont allés en vacances

pense qu’il a allé en vacances avec umm sa petite copine umm

il faisait très beau et beacoup de soleil

il téléphoné umm sa petite copine et fait et fait un rendez-vous d’aller en vacances

sa petite copine est très contente

il s’habille um il met un chemise et

parce que le taxi arrive/ait umm il s’est dépêché descendre...

umm malheureusewment il tombé err de la valise et s’est cassé la jambe

donc il appelé l’ambulance et il errr il appelé l’ambulance et

il ne pouvoir aller en vacances avec sa petite copine

et elle a attend et il n’est arrivé pas

**L 01 POSTTEST 2**

Umm Giselle err elle s’est réveillé et il faisait beau

Err elle a décidé aller une promenade avec ta chien

Ummm quand elle a ummm quand .... no

Pendant la promenade avec ta chiennne elle a vu une fenêtre peintre et …

Umm il et il peindre les volets sur une maison et

il jeté un coup d’oeil à la femme umm et

il s’est tombé et s’est cassé les jambes err

la femme a téléphoné la ambulance et umm l’ambulance arrivé à la maison et

emmené oh et nous prend nous prend

emmener aller à l’hôpital

la chienne était aboyé et la l’homme était désolé

**L 02 POSTTEST 2**

Errr un soir err professeur Maffard dormait

Il était l’hiver et il faisait très froid

Err pend..err à huit heures son reveille-matin a sonné

Mais il il ne l’entend pas errr ss....

Sa femme sa femme a ouvré la porte et il s’est réveillé et

Il s’est levé err il

Et après ca il a pris le café le café très vitement et il a mangé des cereals

Err err il s’est dépêché et il a commencé à pleuvoir

Quand il err quand il sort um sortait /é errrrr chez lui

Il a cour - (il a couri) mais il a manqué le bus

Il y avait beaucoup de vent et il il n’est pas de parapluie

Il était vraiement fâché

Finalement il est arrivé au lycée et

Il était vraiement en retard

Les étudiants err les étudiants lui lui a attendu

Il il est entré la classe à neuf heures et demie

Les étudiants étaient surpris et

Professeur Maffard errr s’est excusé

**L 03 POSTTEST 2**

Umm professeur Maffard dormi umm et le alarm n’est sonné pas umm

c’est l’hiver et c’est très froid umm

Le professeur Maffard a err se réveillé err et

Il prendre le café très vite parce que il était en retard umm

S’est dépêche

il pleuv-il pleuvoir beaucoup umm

Et il courir umm après le bus mais il umm manqué/er le bus ummm

il n’avoir pas de parapluie et il umm

il arrive/é au lycée umm être en retard umm au dix vingt minutes

parce que il courir de lycée umm

les étudiants umm no le professeur Maffard entre la classe

et le étudiants être très surpris et professeur Maffard s’excusé

parce que il a umm n’est réveillé en temps

**L 04 POSTTEST 2**

C’était une histoire de Giselle et elle s’est réveillée

Et il fait beau il y a du soleil

Errr alors elle se elle s’etait levée et elle

Elle sortait le chien quand elle a vu le peintre

et elle était elle est belle et

Soudainement elle a vu il a vu

Alors il a vu et il a il est il s’est tombé de l’echelle

Et umm il s’est cassé la jambe et

Sa femme elle a appelé l’ambulance et ummm

Ils ont emmené à l’hôpital

L’amulance a venu chez toi l’ambulance a venu chez soi

Errr les infermiers ont mis l’homme dans le l’ambulance

**L 05 POSTTEST 2**

Il était ummm il y avait un homme qui se s’est réveillé ummm

Un matin et il et il est pensé sur se... ummm

Sa mari et ummm il y avait beaucoup de soleil

Et ummm donc il a téléphoné ummm et

Faisait un rendez-vous avec umm sa mari

Et il était très content

Ummm après il sss...il s’est habillé et

il est il est allé très vite ummm l’escalier

et s’est tombé et il s’est cassé la jambe

Et il et il s’est conduisé à l’hôpital par l’ambulance

**L 06 POSTTEST 2**

Gérard s’est rélève dans le matin et

il pense à ... il pense petite amie il pense petite amie

aller ummm err aller en vacances

et parce qu’il y a de soleil et il téléphoné sa la petite amie

et errr ..... dans le matin il fait un rendez-vous ummm

errr il il s’habillé/er et mettre une chemise parce que il fait beau

parce qu’il fait beau

et et il fait chaud

ummm il téléphoné une taxi et il s’est dépêché ummmm

parce que il il a en retard umm

il descendre vite et il tombé il a tombé umm

et s’est cassé la jambe umm uhhh

il appelle l’ambulance et allé/er à l’hôpital et

il petit amie ummm et elle attende à l’aéroport

parce que il n’ est pas savoir n’est pas savoir (?)

**L 07 POSTTEST 2**

Une jour la semaine derniere umm une fille umm

se réveillé ummm s’a réveillé

Ummm dans le matin à six heures

quand le soleil umm était bri umm

Et elle a décidé umm se promener umm dans la rue err

avec son chien err

Quand elle err s’a passé devant la maison umm

il y avait ummerr un peintre

Umm et il a tombé dans la rue et il s’est cassé la jambe umm

Umm elle s’a shoqué ummm ummm

La femme a umm de lui umm ella err s’a shoqué aussi umm et

um elle a téléphoné

Um l’ambulance umm de l’hôpital umm

et après ça l’ambulance umm a arrivé umm

Dans la rue et il a ammené à l’hôpital

**L 08 POSTTEST 2**

Umm un matin Giselle se s’est réveillée

Et il faisait très beau le soleil brillait

Et puis elle a décidé de se promener

Elle passait/é elle a passé devant la maison umm devant une maison

Où il y avait un peintre et le il a peindre les volets

Et puis il err l’echelle regardé à Giselle

Et il était il n’est pas il n’a pas concentré et puis

Il est tombé et la peinture renversé et la peinture était noire

Elle est tombée errr il est tombé il s’est cassé la jambe

Puis Giselle a téléphoné au l’ambulance

L’ambulance est venue err

Et le peintre s’est blessé et ummm l’ambulance est arrivée avec un infermier

Puis il lui emmenait/é à l’hôpital et

Le chien aboyait/é err le chien a aboyé au le au l’infermier umm

Et Giselle était très désolée parce que c’ était leur chien

Et puis ummm le peintre était à l’hôpital

**L 09 POSTTEST 2**

Ummm Gérard err se réveille du matin et

Il a pensé aller en vacances parce que il il ferait beau

Ummm puis il téléphoné son son ou sa petite copine et

Il fait une rendez-vous pour ummm une vacance

Ummm puis il s’habille les vêtements et

Il faisait beau et il faisait chaud ummmm

Ensuite il se dépêche umm en dehors et

Parce que le taxi était attendu pour lui

Ummm ummm il descendu très vite et elle ummm il

Il est tombé

Il se cassé la jambe ummm.......

Ummmm puis une personne appelé l’ambulance

Et l’ambulance venu très vite ummm

Sa petite copine était attendu parce que

Uhh parce que elle ne pas savoir savait

ummm

**L 10 POSTTEST 2**

Umm il faisait et Giselle se réveillé/er

Elle décidé/er pour faire en promener

Elle passé/er devant la maison quand elle promené/er

Et le peintre jeté/er un coup d’oeil

Renversé/er la peinture

Il tombé/er et il cassé/er sa jambe umm

La femme dans la maison a téléphoné l’ambulance

L’ambulance arrivé/er très rapide et il ne pouvoir pas marcher

Parce que il blessé/er sa jambe

Umm allé/er à l’hôpital et Giselle être très désolée

Et le chien allé/er avec la homme

**L 11 POSTTEST 2**

Ummm le professeur Maffard a dormi a dormi umm plus à bonne heure ...

Le professeur Maffard umm n’a pas s’est umm s’est n’a pas se réveillé umm

parce que il a oublié err se .... faire

il a oublié se faire réveiller le matin

donc umm il y il y avait une grasse matinée

umm sa uh sa ff... sa femme ouvrié a ouvrié la porte

et il s’est il s’est levé umm

il il pleuvait et il a prené le café

et umm et il a mangé le petit oh il a prené la petit

il a prené la petit déjeuner

umm il a cour- cou- couri il a couri dans le dans la rue umm

mais il a manqué manqué le bus

umm il a arrivé au lycée et il était en retard

umm les étudiants umm les ‘etudiants ont attendu pour il ummm

quand il a entré entré le la classe

les étudiants oh ils étaient surpris s’excuser

**L 12 POSTTEST 2**

Ummm dix ans (ago?) umm professeur Maffard dormi um est dormi

no dormirait umm plus tard err parce que il fait froid et

il a il a um il a été l’hiver

umm et umm trente minutes (later?) plus tard umm

sa femme ouvri um a ouvri la porte

et proffeseur Maffard a se réveille il a il a prend le café et

se dépêcherait oh ummm ( is it passé compose?) se dépêché (?)

après il sorti il a sorti le la maison

pour err aller (to the bus) pour prendre le bus

mais il a manqué le bus et il a fait il a été fâché

parce que il n’avoir pas de parapluie ummm

quand il a arrivé au lycée ummm les étudiants umm

(is it imparfait?- they were waiting?) les étudiants attendrait

et il ent... il a entré la classe et

les étudiants sont surpris mais il il a s’excusé pour être plus tard

**L 13 POSTTEST 2**

C’était le hiver et professeur Maffard est dormir ummm

Et il il oublier/é la le lever le réveille le matin

Il ...(his wife?) sa femme réveiller oh ummm

Il manger/é oh il mangé le ca.. ....no... il bu le café et ... mais oh et

Il sortir il sortir la maison mais il manqué/er le bus

Et il n’a pas de parapluie ... est très on no

Il arrive/é très ... no il est arrivé au lycée

Mais il est en retard uhh

Les étudiants sont surpris parce que il professeur est retard

**L 14 POSTTEST 2**

Umm Giselle umm se réveille um lundi et

Avait très beau et le soleil umm est brille ummm

elle décidé elle a decide a promener avec le chien umm

Elle a passé devant la maison umm quand elle se promené avec le chien

Et umm l’echelle umm le peintre à la ... oh à l’echelle et il jeté un coup d’oeil umm

Mais il a tombé est cassé la jambe umm

Giselle a téléphoné umm la l’ambulance umm

Il il blesser... il blesser/é et il ne pouvoir pas marcher umm

Le l’ambulance arriver/é et umm il est monsé (?) à l’hôpital

Le chien aboyer/é oh yeah, a aboyé et il est désolée

**L 15 POSTTEST 2**

Umm Il dormait et c’est c’est très froid umm dans la nuit

Err dans le matin le ... il le réveille-matin ne sonnait/é umm

Mais quand il le femme lui la porter/ait il reveillé/ait

Umm et s’est s’est

Ummm il prend le café et mange mange/ait/er

Il umm il sorti la maison et couri pour le bus

Mais manqué le bus il manqué/er le bus

ummm s’est ... il pleuverait

Et il n’avoir pas de paraplue

Quand il manqué le bus il est très fâché

Il arrivé au lycée un en retard

Dans la classe l’étudiants attendrait pour le prof

Quand il arrivé/er dans la classe c’était ... il est en retard

Et surprise(?) l’ étudiants est est surpris parce que il est en retard et

.............................. (?)

Il s’est excusé pour (being late) pour être en retard

**L 16 POSTTEST 2**

Err uhmmm c’était le matin quand l’homme a s’est réveillé et

Il a pensé sur sa femme ummm il a

oh il sont oh ils ont décidé pour aller en vacances

parce que um il faisait beau et y avait beaucoup de soleil uhmmm

il s’a téléphoné et il fait une rendez-vous avec elle

il était très heureux ummm

donc il s’est habillé et umm parce qu’il était très chaud

il ummm il n’avait beaucoup de vêtements

umm il s’est dépêché parce que il était très en retard

et le taxi était attendu no le taxi a est est attendu

ummm quand il ummm courant est courant..(?) .

il est tombé errr ummm et il s’est cassé la jambe

et il était très mal il est très mal il avait très mal à la tête .... umm

il a appelé l’ambulance et l’ambulance a venu chez chez lui

et il était bien

**L 17 POSTTEST 2**

Err umm il y a deux semaines ... et quand Gérard umm se réveillé/ait umm

il pensé/ait à umm son oh sa copine oh petite copine umm

Um il il a voudrait umm aller en vacances avec elle

Um alors il a téléphoné à son sa petite copine um

Et parce que um il faisait beau umm umm

Il voud.... ils sont voudrait ou ils ont voudrait ils ont voudrait umm

umm fait-faisait un rendez-vous oh faire un rendez-vous umm

Il s ’habillé umm dans son vêtement umm

Il pris un taxi um mais parce que oh... il a voudrait pris un taxi

Mais parce que ss...ummm il a parce que il se dépêcher umm

il tombé oh il est tombé

Err dans sur la valise et et umm oh no ... et après ça il est tombé umm

son valise sur la valise

Umm et il a cass... oh s’a cassé sa oh son jambe umm

Alors ummm il oh

un autre gens appelé l’ambulance et et oui il il y umm

il y allé ummm dans l’ambulance

Il a emmené à l’hôpital

**L 18 POSTTEST 2**

Umm un jour professeur Maffard umm

No, en hiver professeur Maffard a dormi très ....

En hiver... il faisait ...umm

un jour en hiver umm il faisait ... très (dark?)

C’est la nuit et ummm professeur Maffard umm

Ne pas se levé et umm il mari du .....sa femme ouvré la porte

Et se réveillé /er umm il est très en retard et ummm

Il prend son petit déjeuner très vite ummm parc...

Pour se dépêcher et il sorti

Mais il couri et il il manqué le bus umm

Malheureusement il n’avoir ... il n’avait pas de parapluie et

Il était fâché ummmm err il est très en retard quand il arrivé au lycée

Et les étudiants errr sont attend ...sont attendu ummm

Il entré la classe et les étudiants est surpris

Il ... il leur s’excusé/er

**CLARIFICATION REQUEST GROUP**

**L 19 PRETEST**

Professeur Maffard um a dormi a dort jusqu'à huit heures trente

mais parce que le err le le reveille-matin ne son.. n’a sonné pas n’a pas sonné

um bien um il est en retard mais mmm non malheureusement

son femme a dit que il a besoin de se réveiller de se se reveille yeah bien

puis il a pris le petit déj yeah

mais bien um je pense qu’il a bu du chocolat chaud ou du café très vite

le temps um est pleuvoir bien pleuvoir

et je pense qu’il fait très froid yeah et c’est l’hiver yeah um um

puis il a sort a sorti la maison et mais il a um um il a mon-mon-manqué le bus

mais c’était à l’exterieur c’était très froid

et puis il a besoin d’ aller au college umm (by foot) marcher yeah

et il a arrivé dans il a arrivé à lycée très en retard

et il a um um yeah il a arrivé à 10 heures trente bien

umm il a entré dans la classe ok a neuf heures et demie et

mais les étudiants yeah sont déjà dans la classe

**L 20 PRETEST**

Un homme um se réveille le matin

Et il a pensé um um yeah yeah son petite amie um um

Alors elle il a téléphoné son petite amie um

Et il ils ont decidé um faire un rendez-vous um

Donc il s’est habillé um

C’était très beau et très chaud umm

Et puis umm le taxi a attendre pour lui um

Donc il il est partier/é um et il était en retard

Donc um il a descendre um l’éscalier vite

Um malheureusement um il est tombé sur la télé

et il s’est cassé son jambe um

donc um il il a descendre

l’ambulance u hum et il est venu aux infirmiers

um um il est allé à l’hôpital

et son petite amie um attendre

mais il jamais venir pas

**L 21 PRETEST**

Giselle s’est réveillée à sept heures

Et c’était très beau parce que elle a vu du soleil

Et elle a decidé um pour faire une promenade avec son chien

Et il il a il est aller il a fait une promenade avec son chien

Et voit il a vu le peintre

Et elle a passé devant la maison

Et la le peintre a vu la femme

Et elle a regardé la femme

Et il est jeté un coup d’œil

Et la peinture a s’est renversée

Et il il a il est tombé et

La la la femme um a telefoné le l’ambulance

Et le le peintre um um a cassé son jambe

Et l’ambulance

ne pouvoir pas marcher ne pouvoir pas marcher

l’ambulance um huh

et l’ambulance arriver/é a dix heures et

il il et Giselle est a très stressée

et le chien est aboyé/er oui huh huh oui

**L 22 PRETEST**

Um lundi professeur Maffard um s’est réveille-é

A huit heures um mais

Il il s’est levé à huit heures et demie um

Il il a pris le petit déjeuner um avant

Il pleut um umm

après le petit déjeuner professeur Maffard a a quitte la maison um

mais le bus um a um mais il a manqué le bus um

donc il il est arrivé à l’école um trop tard um

et il a rentré rentré la classe à neuf heures et demie

umm l’étudiant um um a attendu um yeah

**L 23 PRETEST**

Umm il s’est le-levé à sept heures et il fait beau

Il y a de soleil um

Et elle elle fait um une promenade avec son chien

Et il passer/é elle passer/é devant un maison

Et le peintre err se renverser/é

Et il il tomber/é um il se casser/é la jambe

Elle telefoner/é le ambulance ambulance

Et um et il aller/é um hospital

umm le chien est aboyé

**L 24 PRETEST**

Le professeur Maffard a dormi plus tard

Parce que le (clock) réveille-matin ne sonner pas

Et parce que c’est très froid um

La femme de professeur Maffard errr um reveiller um le professeur Maffard se reveiller

Um parce que le femme um son femme (how do you say come in) entrer um

à huit heures et demie um

la professeur Maffard um prendre le petit déjeuner um

et il sortier

il pleut et il vent um

il ne manquer le bus err

il arriver le le college plus tard

et il entrer la classe um à neuf heures et demie err

err err huh (how do you say the students) les étudiants er er surprised um yeah

**L 25 PRETEST**

Il s’a revé à sept heures du matin

Et il fait un rêve err son sa fille copine err

et il fait beau et il

il va aller en vacances

umm il fait téléphoné sa copine err il fait un rendez-vous

ils’habille tout de suite et

il attend le taxi devant la maison il

mais le taxi est en retard et puis nouveau

il est tombé la valise et il

il est allé à hospital (engl) et

un petite amie s’est vené

**L 26 PRETEST**

Umm Giselle s’est reveille umm la matin um

il fait beau et elle est prome-nade passer la maison avec le c hien um

elle est regarder/é la painture et

le peintre et

elle est tombé umm err

la femme appelle l’ambulance et la l’ ambulance arrivier et umm

et emmener à le hôpital

**L 27 PRETEST**

Professeur Maffard a umm umm a dormi um

il il s’est réveillé à huit heures et il s’est levé à hit heures et demie

umm il ummmm il il a pris le petit déjeuner et

umm umm ‘like’ umm

il est arrivé et en retard et

la classe et il est entré la classe à neuf heures et demie et

et les éleves a err attendu

**L 28 PRETEST**

A sept heures Gérard s’est révé et

il fait un rêve à une vacance avec son petite amie err

et à neuf heures elle telephoner/é son petite amie

et err elle fait un rendez-vous err er encore oh oui ensuite pardon

ensuite elle se s’habille et err c’est une c’est une pull ?

et errr elle est en retard et

le taxi attendre devant la maison

et à peu près neuf heures elle tomber/é et s’y casser/é la jambé

et la .. ambulance a apporter/é elle sur

le hospital et petite amie est attendant sur l’aéroport

**L 29 PRETEST**

Giselle s’est réveillé cet aujourd’hui

Le soleil est très grand

Elle se lève et elle se promener/é avec se chien

Un garcon est peint peindre le err est peindre

Il jeter /é un coup d’oeil et il tomber/é

Giselle telephone/é le hôpital

Une ambulance arriver/é et il envoyer/é le garçon

**L 30**  **PRETEST**

Hier Professeur Maffard est fait la grasse matinee

Et à huit heures et demie sa femme se réveiller/é err

Puis il est il prend son petit déjeuner

Et il prenait normalement il prenait le car

Mais il est en retard et err il est il

Puis il est arrivé au lycée en retard aussi

Et les étudiants est dans la classe

Il entrer/é la classe à neuf heures et demie

Et les les étudians est attendre et ... ummm

**L 31**  **PRETEST**

Giselle umm ummm s’est révele umm

Il faisait beau umm

Elle a décidé umm umm les promenade avec sa chien umm

Elle s’est promenée umm elle s’a quitte la maison

Et elle s’est promenée umm dans les rues umm umm

Elle vu le peintre umm sur l’échelle

Umm et le peintre vu umm jeune dame est tombé

Umm sur la rue

La femme a téléphoné l’ambulance umm pour ueah pour l’ambulance a aidé umm

L’ambulance arriver/é umm et umm umm ummm

et l’homme yeah ok err err l’ambulance et la femme umm a stressée

**L 32 PRETEST**

Professeur Maffard a dormi encore à huit heures umm

c’ était très froid et umm

Donc il umm dort ha-ha

Et il umm la femme oh – oh à huit heures umm

Il se réveille et puis il prend le petit déj umm

Il s’est pleure et umm il quitte la maison

Et il umm il y a du vent

Il arriver/é à l’école en retard

et umm les étudiants dans la classe

Et il entrer/é la classe en retard à neuf heures et demie

et il commence la classe

**L 33 PRETEST**

Hier Pierre s’est réveille à sept heures

Et sa err elle fait un reveille de son copine umm oh my gosh

Umm Pierre a téléphoné sa copine umm pour faire un rendez-vous en Espagne

Puis Pierre s’habiller/é et umm et ummm et regarder/é le temps err

Le temps est beau err pour err beau et beaucoup de soleil

Ensuite umm Pierre err s’était être en retard err pour le taxi umm

Et Pierre descendre vite et umm il tomber/é err

Parce que c’est tombé il um umm il ummm

L’ambulance arriver /é et umm prendre Pierre à l’hôpital yeah okay

Et son copine err s’était attendre le aéroport

**L 34 PRETEST**

Professor Maffard il n’est écouté pas le reveille-matin et il dormer/é encore

Parce que c’est froid

La femme ouvrir la porte et professeur Maffard s’est révé

Err il prend le petit déjeuner vite

Et il couri après le bus

Il n’avoir pas le parapluie

Il arriver/é en retard à le lycée err

Mais l’ étudiants déjà dans la classe

Il entrer/é la classe à neuf heures et demie et

Elle commencer le (lesson) le cours

**L 35 PRETEST**

Pierre umm est réveillé à huit heures umm

Il faisait beau

Il fait une rêve err ses petite copine err et

Il f- fait une rêve umm en vacances

Il telephoner/é err ses petite copine

Elle était contente

À neuf heures il fait une rendez-vous err

Il s’habiller/é err très rapide et il faisait chaud

Err le taxi pardon il était en retard et le taxi umm était devant la maison

Err il est tombé errr sur la valise et ensuite l’ambulance est venue et

Et il attend à l’hôpital

la petite amie est attendu aussi

**L 36 PRETEST**

Giselle se réveiller/é le matin

il fait beau et le et elle fait une promenade avec ss-sa chien

err elle passe elle passe err une maison avec une avec err err

Elle passe une maison avec une peintre ( peinter?) peintre errr avant la maison yea

Le peintre le uhh no le la femme de peintre est regardé

est regardé le peintre qui a regardé Giselle

le peintre le peintre tomber /é tomber/é et et le pein la femme de peintre le peintre

est téléphoné une ambulance umm

quand le peintre est entre le l’ambulance le chien est aboyé

**L 19 POSTTEST 1**

Ummmm à huit heures le matin Giselle a se réveillé

et il a vu que il faisait beau

Donc elle a décidé pour se promener ummm

donc il a fait une promenade avec le chien il a sorti avec le chien

yeah et ... elle a sorti avec le chien

et elle a passé devant la maison pendant se promener ummm

et elle a vu quelqu’un qui a peintu les volets ummm

et il a le gens ? qui a ummm a jeté un coup d’oeil

mais il a renversé la peinture et il a tombé aussi

il s’est cassé la jambe et donc sa femme téléphoné l’ambulance

parce que yeah il est blessé très très blessé ? umm

il s’est blessé gravement ummm et il ne pouvoir il ne pouvait pas marcher

donc l’ambulance a arrivé avec le brancard et

il sont marché à l’hôpital pour ummm pour le ....

puis le chien aboye yeah

**L 20 POSTTEST 1**

Ummm cette histoire d’ un homme qui s ‘appelle professeur Maffard

Umm il err c’était un jour de l’hiver et umm il est dormi umm

Il faisait très froid et pendant la nuit et son reveille-matin n’est pas sonné

Ummm donc la femme de professeur Maffard a ouvri la porte de chamber de prof. Maffard

Ummm et professeur Maffard s’est réveillé et s’est levé umm

Et puis er il a pris le café umm et il a mangé et s’est dépêché umm

Donc il est en retard il était en retard umm

Il faisait pluie et ummmm il n’avait pas de parapluie

Donc il est sorti et il est sorti et il etait mouillé umm ummm

Aussi il a manqué le bus donc il était très fâché uhhh ummm

Quand il arrivé au lycée il était en retard umm

et son ses étudiants err sont err attend ... attendre err yeah ses étudiants attendant

ummm il a entré la classe et les étudiants étaient surprise umm

mais professeur Maffard s’est excusé

**L 21 POSTTEST 1**

C’est une histoire de Gérard et oui c’ était umm c’était un matin très beau

Et Gérard a réveill-é et il il a pensé de sa err petit petite copine

Et elle est elle est pensé aller en vacances avec sa umm sa petite copine

Et parce que il il c’ était très soleil et

elle il il a téléphoné son sa petite copine elle s’appelle Magali

et elle est il est il a dit : tu... vous avez faire une rendez-vous

et elle est... était très contente et il s’habille son il s’habille son polo

et il a met son pantaloon et oui parce que il c’était très chaud et

il... il est il était en retard et il dépêché s’est dépêché dép-déêché

et il il il est il est allé descendre vite et son taxi a attendre attende

mais Gérard a tomb... est tombé et il il a cassé la jambe

et il était en trop tard et oui errr

son son ... sa mere appelé l’ambulance a appelé l’ambulance

et il il est vennn... venu en mons...en monn... (?)

et sa petit copine elle est très triste parce que elle elle a

elle a pensé ils sont allés en vacances et oui

**L 22 POSTTEST 1**

Ummm un jour er Giselle err err Giselle se s’est reveille er à sept heures

Et err il faisait beau avec beaucoup de soleil ummm

Donc après le petit déjeuner Giselle dec-decidé oh a décidé umm

umm se promener avec le chien et quand quand elle a prom-promené umm

Giselle err a vu une un peintre qui a peint une oh des er des volets umm

Dans une maison umm la peintre le peintre er a jeté un coup d’oeil et

Il err ah et il et la peintre a tombé ummm de um de l’echelle ummm

Après le la peintre tombé le peintre a tombé est tombé aussi et

Il umm um il uhmm il blessé elle a blessé um son sa jambe

Donc Giselle ummm a téléphoné à l’hôpital et umm

Et l’ambulance arriv- arrivé umm après cinq minutes ummm

L’infirmier les infirmiers umm emmené à l’hôpital umm

Le chien de Giselle umm a commencé aboyer umm

parce que le chien le chien est stressé

**L 23 POSTTEST 1**

Ummm professeur Maffard err il est grasse matinée

Il fait froid et errr il s’est révé à huit heures et demie

Et il prendre le ... prend pris le café et mangé les du pain

Umm il faisait pleuv pleu ummm

il il est sorti err pour le train

Mais il n’avoir pas de parapluie et

Il est fâché et il a arrivé au lycée mais il est peu en retard

Et les élèves attendu ummm il a entre la classe

Il est il est en surprise ... s’excusé

**L 24 POSTTEST 1**

C’ était un oh no... il faisait beau umm Giselle Giselle est se réveillée

Et umm il y a beaucoup de soleil ummm Giselle sort son chien

Ummm il y a un il y a un peintre umm ummm est pentu umm

le peintre le peintre a un coup d’oeil... renverser ... no

le peintre a un coup d’oeil ... renversé la peinture ummmm

le peinture est tombé et le peintre no la femme de peintre telephon...

a téléphoné ummm l’ambulance

puis l’ambulance est arrivée et ...

l’ambulance umm emmené le peintre à l’hospital... no l’ hospital

**L 25 POSTTEST 1**

Umm il a dormi en hiver parce que il est err il fait froid et le nuit

Err le reveille-matin ne pas sonné err

Et sa femme ouvré la porte et il est en retard

Et il est levé tout de suit errr

Il prende le café et mangé les cereals et il est pleuvé

Il est sorti et il y a du vent

Il est très fâché et il est fâché parce que il pleuvait

Err il arrivé au lycée et il est en retard

Et étudiants est arrivé err il est entré la classe

Et il est surprise parce que il est très retard

**L 26 POSTTEST 1**

Umm il est très beau ummm un homme a rev...

s’ est réveillé dans le matin

Ummm il est pens-se en aller en vacances ummm

Donc err elle umm téléphoné umm umm elle une petite amie

Umm et fait une rendez-vous ummm

Elle s’hab-billé umm et descende vite à l’escalier ummm

Mais elle est elle est en retard umm donc elle est tombé

Et s ‘est cassé la jambe ummm errr elle appelé de l‘ambulance err

Et passé les vacances dans l’hôpital

**L 27 POSTTEST 1**

Giselle se réveillée à huit heures et

Il fait beau errr alors elle décidé de s’est promener

Avec le chien et elle

elle a passé devant la maison et

Il y a un peintre et il est umm peindre les volets et

Il est ... il a regardé um Giselle et jet... et il jetté un coup d’oeil

Et le peintre err a tombé et il s’est cassé la jambe

Alors err le ummm le errr la femme a téléphoné le l’ambulance

Et et le peintre se blessé

Alors l’ambulance a arrivé et et et et l’emmené à l’hôpital et et

Il est et elle est stressée

**L 28 POSTTEST 1**

... c’est révé et c’est très froid et car professeur Maffard n’aime

n’aime se révé et à huit heures

Parce que c’est très froid et il très fatigué

Mais à huit heures et demie il se révé et il se lève et après

il prendre le café et mangé ton petit déjeuner

et il pleut err aujourd’hui et il sorti très retard

et il couré mais il manqué le bus

Et err quand il allé au college en pieds à pieds et il arrivé au lycée très retard

Et err étudiants attend pour toi err pour son et il être à cause trop retard et

Le être c’est très surprise parce que il n’aime retard (?)

**L 29 POSTTEST 1**

Gérard s’est réveille et il pense d’une vacance avec son copine

Après il telephone son copine et il fait une rendez-vous

Après il s’habille et le mettre est ...oh.... il

Le le taxi attendre pour il et il courir err sur l’escalier très très vite

Et il tombé

L’ambulance arrive et prend Gérard à l’hôpital

**L 30 POSTTEST 1**

Um Il y un ummm une femme et il elle se révellée

Et il fait beau et il y a beaucoup de soleil

Et il est décidé de faire une promenade

Avec sa chien avec son chien

Il se passé devant umm m maison et

Il y des peintre err ummm et

Il peindre les volets ummm

Mais il regardé elle et il est il uhhh umm

Il est tombé et il se cassé la jambe et

Sss.. et sa femme est téléphoné l’ambulance et

Et umm l’ambulance est arrivée et il umm m il prenait l’hôpital err

Et la femme est stressée

**L31 POSTTEST 1**

Umm Gérard ummm sss.. . il s’est réveillé umm et ummm

Il penser sa petite amie et téléphoné umm à elle

Parler de les vacances umm ssss... s’habile s’habille ummm

mettre une pull umm une chemise

Ummm parce que ilsssss...... fait beau ummm

Gérard il s’est dépêché umm parce que ummmm il en retard ummm

Et il tombé ummm dans la valise et cassé la jambe

Et ummm il allé au hôpital ummm

**L 32 POSTTEST 1**

Giselle ummm elle se réve - réveillée ummm dans le matin

Et il fait beau il y a beaucoup de soleil et elle décide ummm

Faire faire une promenade d’accord umm elle marche avec sa chienne oh son chien

Et elle il y a ummm un un homme sur l’echelle qui ummm

Il piend le les volets et il voir il umm voit le femme la femme et

Il il ummm ok so il jette une coup d’oeil et ....et il renverse la peinture

Umm et il tombe et il se cassé la jambe et ummm

La femme ummm elle téléphone le l’ambulance et

Il se blessé et l’ambulance vient et

Il ne pouvoir il ne peut pas marcher et

Oui l’ambulance arrive et emmener... l’ambulance emmené l’emmené

À l’hôpital et le chien abboyé et elle est stressée

**L 33 POSTTEST 1**

Ummm hier professerur Maffard a umm a dormir dormir ... dormir son lit

Ummm parce que ummm umm était umm fait froid et et umm fait froid et

Très pleut umm err elle ummm il ummm dormir encore

Fait la grasse matinée et umm elle n’est pas écoute de umm alarm le reveille-matin

Umm puis umm son umm son femme ouvré la porte et se réveille professeur Maffard

Err professeur Maffard a prendre le café et manger son petit déjeuner

Umm et s’est dépêcherait umm il quitterait le maison la maison et

Err couré après le bus mais manquerait le bus et

N’avoir pas de parapluie ummm

Il était très fâché umm umm

Professeur Maffard arrivé au lycée umm en retard

et umm mais les étudiants err attendre il

Ummm err professeur Maffard entre la classe et s’est s... s’est excuse umm s’excusé

Et la classe était très surprise parce que professeur Maffard umm était en retard

**L 34 POSTTEST 1**

Quand Giselle réveillé err il faisait beau avec beaucoup de soleil

Donc elle décidé pour faire une promenade avec sa chien

Err pendant le promenade elle passé devant la maison

Err il y a-vait un peintre qui peindre les voles ou les fenêtres

Passé en l’echelle ... il regardera Giselle et il jeté un coup d’oeil à elle

Errr il le peintre il est tombé et il est cassé son jambe ah sa jambe

Err le fille dans la maison est téléphoné l’ambulance

Puis l’ambulance est arrivé et errr

Le peintre n’est pouvoir pas marcher donc err l’ambulance est partir avec il à l’hôpital

**L 35 POSTTEST 1**

Err le professeur Maffard err il fait le... il faisait le grasse matinée

Et l’hiver il faisait froid et

À huit heures et demie

Sa femme ouvré la porte et se réveillé ... je pense errr

Et il était il était en retard er il prenait le café et

Il ne pas mangé parce que il est très en retard

Donc il sortait sa maison et il courait pour le bus

Mais il manqué le bus et

Il pleuvait mais il n’avait pas err son parapluie et

Il était très fâché err

Il arrivé au lycée très en retard et les étudiants attendrait

Il entré la classe et les étudiants étaient très surpris

Mais err s’excusé

**L 19 POSTTEST 2**

Gérard err se réveillé le matin er et

il est il a pensé de ses vacances son vacances non ses vacances

Parce qu’il umm parce qui’il y a de soleil

Et il faisait beau et donc il a téléphoné err sa copine

pour faire une rendez-vous et il était content

Ensuite il s’habillé et il mets sa chemise et ...

parce qu’il fait chaud yeah il fait chaud

Ummm et il a aussi il a umm il se dépêché

parce que il était il était en retard

Et le taxi a lui attendu attendu et a descendé plus vite

Mais parce qu’il est ummm mais parce qu’il est err parce qu’il est couri

était cou-ri très vite il a tombé

et il s’est cassé la jambe err donc le tax ...

je pense que le taxi a appelé une ambulance

pour venir umm mais sa copine sa copine umm était à l’aéroport seule

et il ne savait pas que il umm qu’est ce que s’est passé

donc l’ambulance a est arrivé et il est à l’hôpital

**L 20 POSTTEST 2**

Umm err c’était une femme qui s’appelle Giselle

Umm un jour elle s’est réveillé umm et il faisait très beau

Et il y avait beaucoup de soleil donc elle a décidé err se promener

Avec son chien ummm elle a passé devant la maison quand elle s’est promené

umm et il y avait un homme umm qui a peindré les volets ummm

ummm et le peintre a jeté un coup d’oeil d’oeil ummm à la femme à Giselle

ummm et il a renversé la peinture

ummm il est tombé aussi et il s’est cassé la jambe

donc ummm un autre femme umm qui était dans la maison

a téléphoné ummm pour une ambulance

parce que l’homme était s’est blessé umm

et il ne pouvoir pas marcher oh il ne pouvait pas marcher

ummm l’ambulance s’est arrivé oh errr est arrivé

et il y avait des infermiers

qui ummm a aidé l’homme

ummm et l’homme était emmené à l’hôpital et umm

le chien a aboyé et Giselle était stressé

**L 21 POSTTEST 2**

C’était une histoire de le professeur Maffard et c’était hiver

c’était très froid et le professeur Maffard a err dormi et err mais il

mais son son réveille-matin ne sonné pas n’est sonné pas

et son mari err a errr ouvri la porte et et elle a dit err “Professeur Maffard,

réveillez!” Et il a se réveillé et il a habillé ses..................

et oui il a mange son petit déjeuner

il a prend il a pris le café

et il a se dépêché et et puis il a il est sorti et il est courir

pour umm pour pour aller à le train le bus pour aller au college

parce que il a il est un prof et mais il a il a n’avons pas de parapluie

et il a été fâché et à huit heures trente il a arrivé au lycée

et c’ était ... et il a il a été en retard

et les étudiants ont attendu et oui

il a attendre dans la classe et les étudiants rigolé

il a s’excusé pour être en retard

**L 22 POSTTEST 2**

Umm un jour Gérard s’est réveillé umm et

il a pensé umm pensé il petite copine

Umm il il y a il faisait beau umm et

il décidé telephoner il petite copine ummm

Et nous avons décidé umm nous avons décidé aller en vacances umm

Donc il s’habillé umm il mettre une chemise et uhmmm

Quand ah le taxi atten- ah le taxi a attende pour Gérard uhmm

Et Gérard uhmm Gérard suis en retard et

il descen- oh il a descende vite l’escalier uhmm

et quand errr quand il a descende il est tombé uhmm

et il s’est cassé la jambe uhmm errr

l’ambulance umm a venu après cinq minutes et l’ambulance uhmm

uhmm emmené il à l’hôpital et Gérard ne n’allé pas en vacances

**L 23 POSTTEST 2**

Errr Giselle se Giselle s’est err (mérrivé) réveillé et il faisait beau

Il y avait le soleil et elle a décidé aller une promenade

avec avec son chien sa chien

Et elle passé devant la maison et le peintre a vu Giselle et

Il a il a rencontré la femme de ses rêves et

il jet- il a jeté un coup d’oeil

Et il a revonsé (renversé) la peinture ...

il est tombé et il s’est cassé la jambe

Et Giselle a téléphoné err l’ambulance et

il il ne pouvoir pas marcher err

l’amb-l’ambulance est arrivé et il a emmensé (emmené) à l’hôpital

Et le chien a... est allé aussi

**L 24 POSTTEST 2**

Uhmm Gérard se Gérard uhm a se réveillé ...

non Gérard se est réveillé

Et il ... Gérard a pensé aller en vacances avec

uhmmm son petite copine

Et umm aller en vacances ummm quand il fait beau et beaucoup de soleil

Umm Gérard télephon... Gérard a téléphoné son petite copine et

Il fait une rendez-vous et il fait une rendez-vous umm et

Son petite copine a dit ‘oui’ ummm

et puis Gérard uhmm se s‘ habillé et

Il fait beau et il fait chaud uhmm ... oh le taxi

err le taxi a l’attende et umm

Gérard est peu en retard et uhmmm Gérard a tomb...

Gérard est tombé et

Il se cassé la jambe ummm et une ambulance est arrive

et uhmm Gérard

Oh et Gérard ... no et son petite copine ne pas savoir

et Gérard a allé au hospital

**L 25 POSTTEST 2**

Giselle se réveillé err il fait beau

Errr elle décidé uhmmm une promenade dans errr

Elle passé devant la maison et elle voit ... avec son chien uhm

Et elle voit ... piendre les volets et les fênetres

Errr elle regardé le ... les gens pein-peintre jeter un coup d’oeil

Errr le peintre errr ren-versé errr

Elle tombé et... il tombé et il cassé la jambe

Il téléphoné l’ambulance ... il y a un blessé

Il blessé il a blessé ohh il se blessé et ne pouvoir pas ...

L’ambulance arrivé et il il a arrivé à l’hôpital et

Le chien est aboyé

**L 26 POSTTEST 2**

Ummm c’est l’ hiver et le professeur est dormi dormir

dans umm son lit

Mais c’est très froid et le réveille-matin ne pas de sonner/é

Ummm le err sa femme ouvrié la porte et

ummm le professeur s’est levé

Donc s’est levé et oh sans prendre le café et manger le petit déjeuner

Umm et s’est pleuvé oh s’est pleut mais il n’avoir pas de parapluie

Umm et il il sorti et il courir mais il manqué manqué le bus

Et il il est très fâché err

Quand il arrivé au lycée umm il est en retard ummm

Et les étudiants attendé umm quand il est entré la classe ummm

Les étudiants est surpris parce que le professeur est en retard

**L 27 POSTTEST 2**

Er un jour err Gérard err se réveillé et

Il est pensé de ses petite amie et

Elle il est pensé de vacances et alors

Il est téléphoné ses petite copine et

Et puis umm il s’habillé il est s’habillé

Et il fait très beau

Puis errr le taxi le taxi a attendu et elle est en retard

oh il est en retard

Errr alors errr il et puis il est tombé et il est se cassé la jambe

Puis l’ambulance err a emmené errr de l’hôpital et

Et ses petite copine a ummmm

**L 28 POSTTEST 2**

Une belle matin err Giselle se réveille et er le soleil il y a de soleil

Et err il décidé fait une promenade avec son chien

Et err pendant la promenade errr il passé devant la maison et

Err une peintre err peintre la maison err pour une fille

Et err quand Giselle err fait le peintre jeté une coup d’oeil

Et le paint tombé et il tombé aussi et errr

Après errr il se cassé la jambe et le fille téléphoné le ambulance

Et err errr Giselle a aidé le peintre et

Après le peintre ne peuve pas marche-er et

le ambulance arrivé err

Parce que l’ambulance arrivé très retard

et err une homme aidé le peintre sur le ambulance et

après err err il emmené/er oh les medecins emmener

prendre à la hospital errr

et le chien aboyé beaucoup

**L 29 POSTTEST 2**

Professeur Maffard dormi parce que c’est hiver

Et il fait froid

Il n’écoute pas le réveille-matin

Uhmm il il est il se il s’est lève et il umm prend le café

Et a mange son petit déjeuner

après il s.... il est sorti et il est couri il a couri pour le bus

err puis il est arrive au lycée et il être en retard

il entre la classe yeah

**L 30 POSTTEST 2**

Err un matin Gérard se réveillé et il umm il

Il pensé la petite amie et il voudrait aller en vacances avec elle

Ummm le temps est était beau est beau

Il est il est téléphoné sa petite fille sa petite copine

Et il parlé avec elle à neuf heures err

Puis il s’habillé et il porte une chemise parce que... err oui

Une chemise parce qu’ il fait très chaud

Mais quand umm le taxi est attendre il est tombé dans l’escalier

Et il s’est cassé la jambe errr

Une ambulance est arrivé et à ...

la petite copine est attendre à l’aéroport et mais il n’arrive pas err

**L 31 POSTTEST 2**

Ummm le prof dormir oh le professeur Maffard err

dormi dans le lit

Et ummm il est neuf heures trente ummm

s’est levé ummm et pris le café

et mangé le petit déjeuner ummm

il sortir errr il quitté la maison et arrivé au lycée ummm

mais il est en retard et il entré la classe et voit les étudiants

ummmm yeah

**L 32 POSTTEST 2**

Gérard se reveille et il pense de son petite amie et

Il fait beau il y a du soleil ....

Il veut ummm passer les vacances avec son petite amie

Et ummm il téléphone son petite amie et ummm

Elle pense c’est une bonne ideée et ummm

Il fait une rendez-vous et donc il s’habille ummm

Ummm il doit se dépêcher parce que le taxi attend pour lui

Et ummm il est en retard et il descende l’escalier

Et puis il tombe ummm car le baggage

la valise ummm est sur l’escalier et il s’est casse la jambe

Et son petite amie attend à l’aéroport et...

Okay ils’est casse la jambe donc quelqu’un appelé/er l’ambulance

Et il vient à l’hôpital au dans l’ambulance

Ummm et son petite amie ne pas savoir elle ne pas savoir

Que il à l’hôpital

**L 34 POSTTEST 2**

Il s’est réveille tôt du matin et il fait beau oh il faisait beau

Err quand il est réveille il est pensé à sa à son petit copine et

Il est est allé en vacances

puis est téléphoné elle

son petite copine sa petite copine

Et fait un rendez-vous il est il était content il s’habillé et

Il est mettre une chemise il est il était chaud et il faisait beau

Errr parce que il était en retard il est il a descendu vite errr l’escalier

Mais il est tombé et il se cassé la jambe

et maintenant il était trop retard

errr il est venu dans un ambulance et venu errr

parce que il était à l’hôpital errr il ne venu pas à l’aéroport

et il ne allé ummm il n’est pas allé en vacances

**L 35 POSTTEST 2**

Elle s’appelle Giselle et elle s’est réveillé errr

Elle faisait grasse matinée umm

Elle décidé ummm faire une promenade errr avec son chien

Err elle passé devant la maison

Err quand elle se promené

Et un homme err peintié pentait les volets ummm

Err et et quand il est en echelle il est regardé Giselle

Errr il a jeté un coup d’oeil et il ren- il a renversé la peinture

Uhmmm puis il est tombé errr dans l’echelle

Et il se cassé la jambe

Une fille qui est dans sa maison est téléphoné errr l’ambulance

Ummm il se blesse il s’est blessé mais il ne peuve

il ne pouvoir pas marcher

L’ambulance est arrivé et l’infermier uhmmm aidé il ummm

L’ambulance on a emmené à l’hôpital et le chien a aboyé

Uhmmm et Giselle est très stressé

**CONTROL GROUP**

**L 37 PRETEST**

Il est un homme et il a dormi en hiver et il fait froid

Et le...ummm puis il y avait une femme et

il a ouvri la porte et l’homme s’a réveillé

Se levé et puis umm il a prend des café et mangé

Puis il se dépêché il s’a dépêché et umm il pleuvait

Et ummm il a umm manqué le bus il a manqué le bus

et il avait fâché et puis il a il est arrivé au lycée

Mais les étudiants umm a attendé

et puis il entre il a entré

Et la classe était surprise

et il s’a excusé s’est excusé

**L 38 PRETEST**

C’est une histoire de Gérard un matin cette matin

Il il réveiller/é et il penser/é avec avec son copine

Il il a téléphoné il a téléphoné son son copine

il a il fait un rendez-vous err

Il il s’habiller/é pour le rendez-vous et il il

Il s’est dépêché pour um um pour prendre un taxi

Mais malheureusement mais soudain err er

il s’est il tombé sur sur son valise

Et au lieu de umm rendez...

au lieu de rendez-vous avec son copine er er

Il il allé/er il allé/er au l’hôpital

parce que il cassé/er son jambe

**L 39 PRETEST**

Il s’est réveillé ... c ’est Gérard il s’est réveillé

penser ah penser aller en vacances

umm il... temps .. ah fait beau et du soleil umm

il est telephoner/é umm sa petite copine

Gé... oh ummm nous a fait oh un rendez-vous umm nous content

umm il s’est hab-habillé habillé

il a met une chemise et une pantalon

umm il fait chaud et beau umm

il s’est dépêché ... attendre oh le taxi attendre

umm il a retard umm il descend vite

il est tombé ... se casser/ é la jambe

umm il ... oh vous ... appelons

l’ambulance veni et emmener emmener

du l’hôpital umm il attendre oh elle attendre à l’aéroport

**L 40 PRETEST**

Le professeur Maffard dormi et on lit et les l’hiver

et il fait froid et c’est la nuit

Et le réveille matin ne marcher/ait pas umm

alors la femme de professeur ouvri la porte

et elle réveiller/é le professeur

elle prendre prend le café et mangé le petit déjeuner vite

et s’est dépêché

après ca il sorti pour monter le bus mais le bus on parti umm

il plui il pluié mais le professeur n’est pas de parapluie

alors il tellemont fâché umm

le professeur arrive au lycée mais il est retard

et l’étudiant sont attendre

le professeur entre le classe

et toutes les étudiants sont surpris

le professeur s’excusé

**L 41 PRETEST**

C’est une histoire de professeur Maffard il est dormi

il est l’hiver il est fait froid

Err Il est la nuit et et err err sa femme ouvri la porte

Il s’est réveillé il s’est levé il pre.. il pren il pri le café

Il mang ... il est mangé il s’est dépêché err il était pleuvoir

Err professeur Maffard a de... sorti sa maison err

Err le le il n’est manqé la bus manqué la bus err

Il parapluie il n’était pas de pluie il était très fâché err

Puis il arrivé à lycée err er il était en retard

Les étudiants atten... sont attendu err

Il sont um il entre il entré la classe

et les étudiants sont surpris

Parce que il était en tard

**L42 PRETEST**

Il fait beau umm il y avait du soleil umm ummm

Giselle s ‘est reveillée

Et elle a décidé se promener err

elle est passée devant la maison

Ummm se err un peintre ummm il peindre les volets

Umm la femme umm ummm .....

le peintre jeté un coup d’oeil

Et il a renversé la peinture ... il tombé et umm

et il s’est cassé la jambe umm

Alors umm sa femme a appellé le l’ambulance

Ummm il s’est blessé err err et il ne pouvoir pas marcher ummm

L’ambulance arrivé et emmené à l’hôpital à l’hôpital err

Le chien a aboyé et la fille est stressée

**L 43 PRETEST**

Gérard se reveille err il pens ...

penser/é/ait aller en vacances

Il fait du soleil il fait beau umm

Il il est il téléphoné il a téléphoné err

sa petite copine

Umm il il se ils sont fait un rendez-vous err

Il a content er Gérard s’habiller/é er

Il il fait chaud umm s’est dépêché err

il attend ummm il

il en retard umm il il a descendu vite err

il a tombé err sur la valise err

s’est cassé la jambe

il s’est cassé la jambe umm il appelle l’ambulance

err il venu emmener err l’hôpital oui

**L 44 PRETEST**

Giselle err err Giselle réveiller/é à sept heures

Il y avait beau umm et il fait du soleil err

elle a décidé err se promener umm

Elle a passé devant la maison à se promener er

Err ... umm le peintre ...

le garcon jeté un coup d’oeil et renverser/é

et il c’est tombé tombe

et s’est cassé la jambe .... téléphoné

elle appeler/é elle a appelle une ambulance

umm le lui a blessé umm

le garcon ne pouvoir pas marcher

umm l’ambulance arriver/é umm

la ambulance a emmené à l’hôpital et

la Giselle a très désolée

**L 45 PRETEST**

Professeur Maffard est dor ...dormer /é

c’est froid et la nuit errr elle il la femme vient (?)

professeur Maffard a ... (?) reveillé ...(?)

puis s’est lève puis professeur Maffard prend le café et manger/é /ait

le petit déjeuner umm

puis professeur Maffards sorti la maison

umm dans la rue

courir et le vent ummm

professeur Maffard elle fâche puis arriver/é/ait au lycée

et professeur Maffard en retard

umm et les étudiants umm atten... attendant

professeur Maffard entre la classe

et les étudiants surprise ummmm

professeur Maffard l’excuser

**L 46 PRETEST**

Dans un matin Gérard err s’est réveillé et pense de errr le copine

Elle aller à en vacances

Le ... se fait beau oh um il y a du soleil

il telephoner/é sss.... il.. le copine

et fait un rendez-vous

Il a content

Il s’habiller/é mettre sss....le chemise

il dépêcher/é pour prendre

Un taxi attendre pour Gérard

Il a en retard il descendre vite l’escalier

il tombé/er s’est casser le jambe

Il est trop tard il appeler/é l’ambulance ... (?)

Il prendre ne pas savoir s’est passer

il n’est pas attend les vacances

**L 47 PRETEST**

Le matin une femme qui s’appelle Giselle

elle se sont reveillé

Et il était une très be...umm il y avait beaucoup de soleil

Alors elle ss um... elle a décidé pour une promenade

avec ssa sson chien

Et elle a marché presque une maison qui il y a une peinture et

il a il est peignait les volets et puis le peintre umm

il a renversé la à l’echelle

et il se sont cassé sa jambe

alors une femme vieille dans la maison

elle a téléphoné l’ambulance

puis l’ambulance a arrivé et s’est tout bien um

umm

et la femme était stress

**L 48 PRETEST**

Professeur Maffard err err réveille-matin err n’est pas sonné

Err err il réveiller à huit heures et demie umm

Il fait froid umm et la nuit umm umm

err il est petit ... il est mange petit déjeuner

Puis ... on retard le bus err

Il est fâche fâché err

Il est arrivé au lycée en retard err il est entre err la classe

et s’excusé /er les étudiants

Umm err le le les étudiants surpris

**L 49 PRETEST**

Giselle s’est err um Giselle s’est um réveillée

Umm il faisait beau err et il y a il y avait du soleil

er dans le ciel

Er elle elle a décidé err er prendre um une promenade um

umm elle a elle a passé devant la maison er um

elle s’est pro...promenée er

peintre les volets umm l’echelle er sur l’echelle regardait /é

um le peintre umm um jette um a jette (?)

un coup d’oeil a renversé

le peintre um il est tombé et um

il a s’est cassé la jambe um

une fille er d...dans la maison a téléphoné er er l’ambulance

um um le peintre se um a s’est blessé um

er il a il ne il il ne pu pu pas marché um

l’ambulance arrive arrivé um

l’infermier ils sont emmené à l’hôpital um

le chien a aboyé et Giselle a stressé

**L 50 PRETEST**

Le professeur Maffard dormé er ii lest nuit et il fait froid

Il sonner err le réveille-matin err sa femme ouvrer/é la porte et

Il s’est réveillé er ils’est levé um

Il prendre le café et mangé/er/ait se dépêché/er/ait pour la classe

Il ss.. courir pour la err bus umm il fait le vent il manque le bus

Il ne pas de parapluie fâché

il arriver/é/ait au lycée err

Il il est en retard

Entré/er dans la classe et il est très désolé err err

La classe les étudiants er er a il s’est excuser/é

**L 51 PRETEST**

Gérard s’est réveillé umm er il y a du soleil et beau umm

Et il penser la vacances avec sa petite copine

Il téléphoné /er la petite copine umm et un rendez-vous

Il il a content umm il s’habiller/é umm il metre une chemise

Le soleil le soleil briller/é umm

Il s’est dépêché

Um il um retard il descenduer/é umm il tomber/é

s’est cassé la jambe

Se casse ... parce que trop tard umm

Il appeler l’ambulance umm

L’ambulance venir umm umm

Et elle n’est pas savoir

**L 52 PRETEST**

Un matin professeur Maffard est dormi très tard

ah c’est hiver

Et il pleuvait beaucoup

Ah et puis son mari arriver/é/ait à la chambre et

dit “leve-toi c’est très tard “ ah

quand elle est levé elle prend le petit déjeuner très vite

Car il était très tard pour son occupier et

puis il courir pour le bus pour prendre bus mais

car il était très tard le bus départer/é avant et

elle arrive/é à la bus stop l’ârret de bus

alors quand on arriver/é au lycée il était très retard

et les étudiants a été/ait dans le classe

et quand on entrer/é les étudiants déjà là hmm

**L 37 POSTTEST 1**

Umm ... c’est un jeune homme et umm

il s’appelle Gérard

Et Gérard se réveillé s’est réveillé et umm

il pensé à aller en vacances

Et parce que il fait beau et le soleil brillait

et il a téléphoné à son amie

Et umm il veut faire un rendez-vous et

puis il errr s’est habillé

Et umm le taxi err se dépêché err

a attend a attendé err devant err sa maison

Et umm errr quand il est allé il tombé il a tombé et

il s’est cassé la jambe

Et umm quelque personne appelé l’ambulance

et umm Gérard a venu emmener à l’hôpital

**L 38 POSTTEST 1**

C’est une histoire de Giselle dans le matin

Cet matin elle s’est réveillée il faisait beau et puis

Elle est décidé elle décidé pour faire une promenade et

Quelques temps quelque temps tard

il passé devant la maison

Et il il... elle vu un peintre et

Soudain le peintre est perdre son équilibre et tombé

et cass.. et il s’est ...il cassé son jambe

Soudain puis il téléphoné pour une ambulance

très vite

L’ambulance est arrivé très vite

**L 39 POSTTEST 1**

Il a dormé umm à le matin umm

il ouvre la porte ummm

Umm il s’est levé umm

il a mangé le petit déjeuner umm

Il a manqué le bus pas du parapluie umm

Il a retard à lycée umm err il excusé la étudiants

**L 40 POSTTEST 1**

Giselle s’est réveillée un matin

La jour fait beau avec beaucoup le soleil err

Elle decider pour s’est promener

A aller promener elle passé devant la maison

Un garcon monte les volets et il tombé à l’echelle

Umm le garcon tombé et s’est cassé la jambe

La femme téléphoné les ambulance et

il parlé avec les infermiers

Il dit que le garcon s’ est blessé

et il ne pouvait pas marcher

L’ambulance arrivé et il emmené le garcon à l’hôspital

Et le chien de Giselle aboyé

**L 41 POSTTEST 1**

Cette histoire s’est passée il y a une semaine

Giselle s’est réveillée la journée était beau

il y a de soleil

Elle a décidé err a décidé va la promenade

Elle a passé devant la maison

Le peintre peindre les volets

Il est regarde err la err la peintre jeté un coup d’oeil

Err il renversé la peinture il est tombé

Err il s’est cassé la jambe

Giselle a téléphoné l’ambulance err

Il s’est blessé il ne pouvait pas marcher

L’ambulance a arrive avec l’infirmier err

on a emmené à l’hôpital

Le chien a aboyé Giselle était désolée

**L 42 POSTTEST 1**

Gerard s’est réveillé umm et il penser umm sa petite amie

Umm et d’aller en vacances err

il fait des faison (?) beau hmmm

Et Il fait de soleil umm il téléphoner umm il petite amie et

Il fait un rendez-vous et il est content umm

Il s’habiller ummle metre umm

Le taxi attendre et il est s’est dépêché et il en retard

Umm alors il descendre vite mais il tomber et

Il s’est cassé la jambe err l’ambulance a venu err

emmener à l’hôpital

Umm la petite amie n’est pas savoir

**L 43 POSTTEST 1**

Il dorm-il dormir umm il dormir uhh il a dormir? Umm

Il a dormir la nuit sonner

Il fait froid ummm sa femme err sa femme a ouvri

a ouvrier la porte

Err s’est reveille il a sa se reveille

Err il a mangé le petit déjeuner err

s’est il a s’est dépêché err

Il s’est dépêché er au manger

Umm il a sortir sorti ummm

Il a arrive err il a iarrivé au lycée en retard

umm il allé il allé etudiants

Umm quand il a entre la classe err

les étudiants surpris

**L 44 POSTTEST 1**

Gérard a réveillé à huit heures

Il a pense aller en vacances avec son fille ...

avec son petite amie

Et il a vu il fait du soleil il a téléphoné son petite amie

Et il fait un rendez-vous et ils sont contents

Err Gérard a s’habillé il a mettre une chemise

Il fait très beau il fait chaud ummm umm

Gérard a dépêché

le taxi a attendre err

pourquoi Gérard en retard

Il a descendre vite umm Gérard a tombé

et il cassé la jambe et

Gérard a trop tard

Le taxi garcon a appelé une ambulance et

l’ambulance a veni err

Oh il son petite amie err n’est pas savoir n’a pas savoir

Elle n’avait passé

**L 45 POSTTEST 1**

Giselle s’est réveillée à matin il y a du soleil

et il décidé umm

Je décidé aller s’est promener avec le chien errr

Giselle passé devant la maison err

Le garcon l’ echelle umm l’echelle au l’echelle est peindre

Avec la femme à la fenêtre umm le garcon

le peintre voit Giselle

Umm les garcon tombe et il s’est cassé jambe

et la femme téléphoné au ambulance

l’ambulance arrivé et le garcon s’est blessé umm

l’ambulance prendre à l’hôpital et ...

**L 46 POSTTEST 1**

Professeur Maffard a dormi er parce que son réveille-matin errr

Ne sonner pas err

Il a il ohhh c’est pleuvoir il y a pleuve err

Son sa femme ouvre la porte et err il a levé

il a prendre le café et mangé un petit déjeuner

Err il y a oh elle est en retard

Il a sorti et courir à la bus

et il manqué le bus il y a fâché

Err il arrivé au lycée en retard

et les étudiants attendre errr

Il entre la classe et les étudiants a surpris et ...

**L 47 POSTTEST 1**

Une matin il s’est il était dormir et c’était très tôt

Et puis il umm c’était très froid et puis um

Sa femme il s’est réveillé il s’est levé très tard

Puis il s’est dépêché et puis

il a prend une café et mangé sa petit déjeuner

Et puis err il a couri dehors et il a il s’est .......

de pris sa bus

Mais il est manqué le bus

Et il faisait ne beau pas c’était plus très froid

Alors parce que il a manqué le bus il a pas marché à l’école

Et il a arrivé au lycée en retard

et quand il a arrivé

Les étudiants étaient attendé

la classe et err il s’excusé

Et c’est ça

**L 48 POSTTEST 1**

Giselle s’est réveillé un beau err de jour et

il y a du soleil

Elle décidé umm s’est promenade avec elle chien

Elle passé devant la maison pendant s’est promener

Il est peindre les volets

il peintre Giselle un coup d’oeil

Renversé la peinture

Err le peintre tombé et s’est cassé la jambe umm

Sa femme téléphoné à l’ambulance err

Le peintre s’est blessé err umm

l’ambulance arrivé umm

l’emmener à l’hôpital

le chien aboyé

**L 49 POSTTEST 1**

Gérard um se réveillé umm umm et

il est pensé umm à son petite amie

Umm err nous err.. ils allé umm

ils sont allés en vacances

Umm il y a il faisait beau et il y avait de soleil

Umm il est il est téléphoné um à ton petit (déjeun...)

umm à petite amie

Umm il a fait une rendez-vous umm

Il sa... ils sont contents err il s’habillé ummm

Mais ummm il est met... met la chemise umm err

Il s’est dépêché umm err le taxi attend pour umm

pour Gérard

Umm Gérard a en retard oh oh avait en retard oh

était en retard umm

Et il a descendé vite err il a tombé umm

Et il s’est cassé la jambe err il a trop tard

Umm ils sont appelé l’ambulance err umm

Ton petite amie attend à l’aéroport ummm

Elle umm elle n’est pas savoir err et elle s’est passé

**L 50 POSTTEST 1**

Elle s’est réveillée il fait beau et du soleil

Il decidé s’est réveiller et s’est promener

Elle passé devant la maison s’est promener

L’homme peindre le volets l’echelle umm regarde

Le peintre voit

il tombe

Errr le femme se casse la jambe

Errr il téléphoné l’hôspital err

Il est très blessé il ne pouve pas marcher

Err umm ils emmené à l’hôspital

et le femme stressée

**L 51 POSTTEST 1**

Il fait nuit umm

c’était hiver il fait froid

Umm sa femme ouvrié la porte umm

Il s’est réveillé umm il est umm il

il prend le café

Umm c’est pleuvoir il sorti

Manque le bus il fait le vent

Il arrivé au lycée en retard

Les étudiants attendre umm

il entre la classe surprise

S’ est excusé

**L 52 POSTTEST 1**

Un jour Gérard a réveillé et

il y aura beaucoup de soleil

Err il pensé de son petite amie

Alors il a décidé de téléphoner sa

et nous décidé décidons

Avait en oh... faisait en rendez-vous

Err et puis elle avait commence (?) d’habiller

d’habiller et umm

metté ses vêtements ummm

alors elle était très content et

puis il se dépêché

pour voir son petite amie

umm quand il était couri sur escalier

elle était tombé et

il s’est cassé son jambe

alors il ne n’a oh

il ne pourrait pas vu son petite amie et

il était dans l’hôpital

**L 37 POSTTEST 2**

Giselle s’ a réveillé le soleil brillait

Et il a décidé de se promener

Il a passé de... devant une maison et

ummm il y a il y avait le peintre

Et le peintre peintre a jeté un coup d’oeil à Giselle

Et puis il a tombé et et s’a cassé la jambe et

Une femme dans la maison a télépho.....

est a appelé l’ambulance

Et l’ambulance a umm ummn

l’ambulance a emmené le peintre à l’ hospital

**L 38 POSTTEST 2**

Il était .... c’est une histoire avec une femme

avec une jeune femme

Qui s’appelle Giselle

Un matin il elle décid...

elle s’est réveillé et il y avait du soleil

Après un period de temps elle passé devant la maison

et il elle s’est promené

.... il y a il y a un peintre peindre les volets

Et soudain il jeté un coup d’oeil

Mais après ca il est il tombé en l’echelle

Et il cassé son jambe

Après ça il est elle est parlé au telephone

Elle appelle elle appelle ambulance

L’ambulance arrive/er/ait très vite ... à l’hôpital

**L 39 POSTTEST 2**

Ummm il réveiller/é un matin de soleil umm

Il décidé/er il d’ecidé/er ummm de se promener une chienne

avec une chienne

Ummm il passer il passer elle passer/é/ait une maison ummm

il y a du peintre ummm

le peintre regarder/é/ait le la femme

umm elle est tombé elle est tombé umm sur la rue

il telephoner/é ... oh s’appelle l’ambulance ummm

il s’est blessé ummm l’ambulance arrive/é/ait ss...

ummm aider la homme

and ummm elle oh elle aller l’hôpital il aller/é

elle emmener à l’hôpital

**L 40 POSTTEST 2**

Err Gérard s’est réveillé et il pensait /er/ait pour aller en vacances

avec les petites amies

Uhhh à un vacances avec beaucoup de soleil ummm

Il téléphoné/er/ait les petites amies

pour faire un rendez-vous et

Il s’habiller urrr son pull sa chemise

et la jour sont beaux et chaud

avec beaucoup de soleil ummm

la garcon dépêcher/é/ait parce que

Il sont en retard et ils descendre vit-te

le taxi

Mais il tomber/é/ait et s’est cassé la jambe

Le petite amie appeler/é l’ambulance qui

vené emmener à l’hôpital et

S’est n’est pas savoir oh

la petite amie n’est pas savoir

**L 41 POSTTEST 2**

C’est une histoire qui s’est passée err il y a deux semaines

Gérard s’est reveillé err il y a pense

pensé d’aller en vacances

Parce que le temps était beau il y a beaucoup de soleil

Il est téléphoné err to fait un rendez-vous errr

Il est ... elle sa petite amie était content err

il s’habillé err le temps était beau err

il s’est dépêché parce qu’il y a en retard

Le taxi a attendu err il y a errr il a descend vite

Il s’est tombé et il s’est cassé la jambe umm

le taxi a s’appele l’ambulance

Et l’ambulance a venu err ils ont on a emmené à l’hôpital

Elle son petite amie a attendu

parce que elle ne sait pas qu’est passé

**L 42 POSTTEST 2**

Professeur Maffard dormé dormi uuuuu et il est très froid

Umm à cause de ummm l’hiver umm et

Le réveille-matin pas sonner et umm le sa femme ouvri la porte et

Et professeur Maffard ne réveiller et lever et

Il prendre le café et a mangé vite...err r il fait pleuvoir umm

Professeur Maffard sortir mais il manquer/é/ait le bus et

Il étiat fâché

Le professeur arriver/é au lycée en retard et

Les étudiants attendre

le professeur entre la classe et il n’excuser

l’étudiants était surpris

**L 43 POSTTEST 2**

Ummm elle s’est réveillé ummm errr elle décidé

elle décidé s’est promener

Elle décidé de se promener ummm

elle s’ est promené devant la maison

Ummm il il ohh okay il a peindre les volets ummm et

L’echelle regarde ummm

il est jeté un coup d’oeil renverser la peinture

Il est tombé oh il est tombé ummm ah

S’est cassé ... oh il s’est cassé la jambe ummm ummm

Elle sont téléphoné umm téléphoné

s’appelle l’ambulance uhhhh

S’est blessé ummm les infermiers err arrive/é

umm il s’est blessé

Et n’est ... et il n’est povoir pas marcher marcher ummmm

Ils sont emmené à l’hôpital

**L 44 POSTTEST 2**

Err errr professeur Maffard il s’appelle professeur Maffard

Et il a dormé il fait très froid ummm

Ummm sa femme ouvrié la porte et il s’est réveillé ummm

Il s’est levé ummm il a prendre le café

Et il mangé et il y a pleuvoir

Ummm err il y a peluvoir et professeur Maffard manqué/er le bus

Il n’a pas de parapluie

Professeur Maffard arrive/é au lycée il y a en retard errr

Professeur Maffard a entre dans la classe et

étudiants a très surpris

**L 45 POSTTEST 2**

Gérard s’est réveillé et il penser/é il fille

Ummm il penser/é aller en vacances

Il y a beau de soleil et très chaude

Puis il téléphoné/er une fille et fait une rendez-vous

Et elle est elle être contente um

Puis il s’habiller et il y a très beau et chaud

Ummm puis Gérard s’est dépêché

parce que en retard

Et descendre vite parce que le taxi attendre

Puis Gérard tomber/é ummm

Et il s’est cassé la jambe

L’ambulance arrive/é/ait

et venir à l’hôpital ummm

**L 46 POSTTEST 2**

Giselle s’est réveillée errr dans la matin

Et il y a soleil err elle décidé s’est promener avec le chien

Elle passer devant la maison et s’est promené et

Un homme peindre les volets et l’ echelle regarde

Sur l’echelle regardé/er .... et le peintre oh

il jeté un coup d’oeil

Et renverser la peinture

Il a tombé dans la rue et s’est cassé la jambe

Elle téléphphoner/é appeler l’ambulance et

Il s’est blessé la jambe et ne pouvait pas marcher

Les l ’infermiers arriver/é/ait um a arrivé

arrivé et emmener/é à l’hôpital

Le chien a aboyé oh le chien a aboyé

Elle a stresse

**L 47 POSTTEST 2**

C’est une histoire d’un homme qui s’appelle Gérard

La semaine derniere Gérard s’est réveillé et

il a pense umm il a pense

Que son petite copine

Alors sont deci... oh ils ont ... no... il a téléphoné elle

Et errr il organisé pour une rendez-vous avec elle

Aalors err il s’habille umm et c’est un jour très beau

Il faisait beaucop de soleil

Err alors il... le taxi était attendre ssss...umm dehors

Il s’est dépêché err il s’est dépêché sur l’escalier

dans l’escalier

Mais il a tombé et il s’est cassé sa jambe

Ummm alors il a téléphoné l’ambulance et

il a finé (?)umm à l’hôpital

Et il n’est pas savoir à faire un rendez-vous

avec sa petite copine

Et il n’est ssss ...oh, il n’est rendez-vous pas avec Gérard

**L 48 POSTTEST 2**

Er Gérard s’est réveillé er un matin

Il penser/é errr la petite amie err aller en vacances

Errr Gérard téléphoné/er err la petite amie err

Elle est contente err il fait un rendez-vous

avec la petite amie

Il y a du soleil et beau temps

Il s’habiller ....il en retard et descendre vite

Le taxi arriver /é ... il tomber/é

l’escalier ummm

La vaiselle (?) sur la valise tomber/é

Err il s’est cassé la jambe err

l’ambulance arriver/é et venir

Emmener à l’hôpital umm

il n’est pas savoir

**49 POSTTEST 2**

Le professeur Maffard umm il est dormi umm il y a ummm

il avait err l’hiver umm et c’ était froid ummm errr

Le réveille- matin ummm ne sonné pas umm et

umm le professeur a ummm dormi

Umm errr er lui errr sa femme ouvri le porte a ouvri le porte et

umm et ummm dit

et il dit se réveiller ummm et s’est umm

il s’a levé ummm

Il est prend umm il est prend le café umm et

il a mangé umm mais umm

Errr il s’a dépêché umm

le temps ummm était mal et il y avait de pluie

Ummm il a sorti ummm et il a couri ummm

il y avait umm de vent et umm

Et il manqué il a manqué le bus ummm

il a oublié umm de le parapluie errr

Ummm alors il a fâché umm

il a arrivé au lycée umm en retard ummm mais

Les étudiants a attend attendu ummm

le professeur ummm a entré la classe et

les étudiants a surpris errr

le professeur um a s’excusé

**L 50 POSTTEST 2**

Err il réveiller/é et il pense d’aller en vacances

avec sa petite amie

Umm il fait beau et du soleil

Il téléphoné la petite amie et

il fait un rendez-vous

Il s... était content

Il s’habillé et umm il s’est dépêché

parce que le taxi en retard

Errr il tombe l’escalier et s’est cassé la jambe

Il appelé l’ambulance

L’ambulance a venir

Il n’est pas savoir elle n’est pas savoir umm

Umm ils n’est pas vais les vacances

**L 51 POSTTEST 2**

Giselle s’est réveillée umm il il y a du soleil

et décidé s’est promener

Ummm avec son chien ummm

elle passé/er/ait devant la maison ummm

Un garcon peindre les volets les fênetres ummm

Le peintre jeter/é un coup d’oeil

Renverser la peinture renverser/é la peinture ummm

Il sa femme téléphoné/er errr l’ambulance ummm

la l’ambulance arrive/é

ummm ne pouvoir pas marcher

il s’est blessé

emmener à l’hôpital err elle stressé

**L 52 POSTTEST 2**

Un jour Giselle ummm se réveillà et il faisait beau

Ummm il y aura beaucoup de soleil et

Elle a décidé de alle oh

de aller pour un promener

Umm à son promenade elle passé devant un maison

où un homme était peindrait les volets ummm

il a uhhh l’echelle regardé et puis ummm l’homme ...

il jeté un coup d’oeil et puis la peintre tombé

et il aussi tombé de l’escalier et

il s’est cassé son jambe

Giselle était trop *distraught et elle téléphoné l’ambulance

Et puis umm l’homme se cassé son jambe et

l’ambulance arrivé

Et emmené à l’hôpital

Le chien était aboyé
